# Supplementary material
Source: PubMed Central journal article supplement (PMC3420821)

## Supplemental Information

## NIR-mbc94, a Fluorescent Ligand

that Binds to Endogenous CB<sub>2</sub> Receptors

## and Is Amenable to High-Throughput Screening

Michelle Sexton, Grace Woodruff, Eric A. Horne, Yi Hsing Lin, Giulio G. Muccioli, Mingfeng Bai, Eric Stern, Darryl J. Bornhop, and Nephi Stella

**Supplementary Table 1, related to Figure 2: Screening compounds against NIR-mbc94 binding in intact cells**

Each compound was incubated at 1  $\mu$ M with CB<sub>2</sub> mid cells and fluorescence emitted by NIR-mbc-94 binding quantified as described in the Materials and Methods section. Two positive controls (*i.e.* WIN55,212-2 and JWH-015) outcompeted mbc-94 binding by 23-26% percent (*i.e.* 77 and 74% of total binding), respectively. Thus, these and any other compound that outcompeted mbc-94 binding by  $\geq$  25% were highlighted in bold.

| Systematic IUPAC name                                                                                                                 | Compound name       | NIR-mbc94 binding (% of total) | Chemical Structure                                                                    |
|---------------------------------------------------------------------------------------------------------------------------------------|---------------------|--------------------------------|---------------------------------------------------------------------------------------|
| (R)-(+)-[2,3-Dihydro-5-methyl-3-(4-morpholinylmethyl)pyrrolo[1,2,3-de]-1,4-benzoxazin-6yl]-1-naphthalenylmethanone                    | <b>WIN 55,212-2</b> | <b>77 <math>\pm</math> 7</b>   | 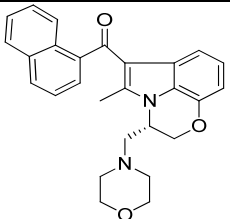  |
| (2-Methyl-1-propyl-1H-indol-3-yl)-1-naphthalenylmethanone                                                                             | <b>JWH 015</b>      | <b>74 <math>\pm</math> 7</b>   |  |
| [(3S)-2,3-Dihydro-5-methyl-3-(4-morpholinylmethyl)pyrrolo[1,2,3-de]-1,4-benzoxazin-6-yl]-1-naphthalenylmethanone monomethanesulfonate | Win 55,212-3        | 110 $\pm$ 57                   |  |
| 4-Methoxyphenyl(2-methyl-1-(2-(4-morpholinyl)ethyl)-1H-indol-3-yl)methanone                                                           | Pravadoline         | 119 $\pm$ 48                   |  |

|                                                                                                           |                               |          |                                                                                       |
|-----------------------------------------------------------------------------------------------------------|-------------------------------|----------|---------------------------------------------------------------------------------------|
| 1-(4-chlorobenzoyl)-5-methoxy-2-methyl-1H-indole-3-acetic acid, morpholineamide                           | Indomethacin morpholinylamide | 111 ± 33 | 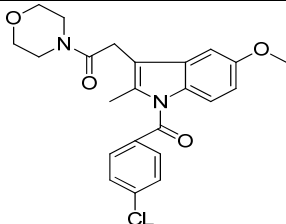   |
| 1,3,8-Triazaspiro[4.5]decane-2,4-dione, 8-[[1-(2-methoxyethyl)-2-methyl-1H-indol-3-yl]carbonyl]-3-methyl- | SYN 22867422                  | 86 ± 9   |    |
| (3-((dimethylamino)methyl)piperidin-1-yl)(1-(2-methoxyethyl)-1H-indol-3-yl)methanone                      | SYN 19993370                  | 70 ± 2   |    |
| 4-[5-(4-methylphenyl)-3-(trifluoromethyl)pyrazol-1-yl]benzenesulfonamide                                  | SC 58215                      | 107 ± 27 |   |
| 1',1'-dimethylheptyl-Δ <sup>8</sup> -tetrahydrocannabinol-11-oic acid                                     | Ajulemic Acid                 | 107 ± 21 |  |
| N <sup>6</sup> -methyl 2Ċ-deoxyadenosine 3Ċ,5Ċ-bisphosphate                                               | MRS 2179                      | 79 ± 6   |  |
| 5-methyl-4-[(1R,6R)-3-methyl-6-(1-methylethenyl)-2-cyclohexen-1-yl]-1,3-benzenediol                       | O-1602                        | 84 ± 4   |  |
| 2-acetoxybenzoic acid                                                                                     | Aspirin                       | 85 ± 12  |  |
| 4-bromo-1,5-dimethyl-N-4-morpholinyl-1H-pyrazole-3-carboxamide                                            |                               | 105 ± 24 |  |

|                                                                                                            |  |         |                                                                                       |
|------------------------------------------------------------------------------------------------------------|--|---------|---------------------------------------------------------------------------------------|
| 1--[2-methyl-1-(2-phenoxyethyl)-1H-indol-3-yl]ethanone                                                     |  | 84 ± 8  | 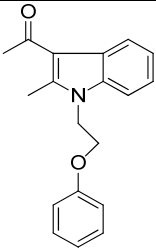   |
| 9-methyl-3-[(2-methyl-1H-imidazol-1-yl)methyl]-1,2,3,9-tetrahydro-4H-carbazol-4-one hydrochloride hydrate  |  | 77 ± 5  |    |
| 4-[2-(1-ethyl-2-methyl-1H-indol-3-yl)-2-oxoethyl]-2H-1,4-benzoxazin-3(4H)-one                              |  | 77 ± 6  |    |
| 3-[2-(1-ethyl-2-methyl-1H-indol-3-yl)-2-oxoethyl]-4(3H)-quinazolinone                                      |  | 80 ± 11 |    |
| N-benzyl-2-[2-methyl-3-(trifluoroacetyl)-1H-indol-1-yl]acetamide                                           |  | 70 ± 7  |   |
| 4-Carbazol-4-one, 1,2,3,9-tetrahydro-9-(phenylmethyl)-                                                     |  | 79 ± 6  |  |
| (3,4-Dihydro-2H-quinolin-1-yl)-(1-methyl-1H-indol-3-yl)-methanone                                          |  | 85 ± 22 |  |
| (1-Ethyl-5-methoxy-2-methyl-1H-indol-3-yl)-(3-[1,2,4]triazolo[4,3-a]pyridin-3-yl)piperidin-1-yl)-methanone |  | 67 ± 9  |  |

|                                                                                                                         |  |                      |                                                                                     |
|-------------------------------------------------------------------------------------------------------------------------|--|----------------------|-------------------------------------------------------------------------------------|
| <p>(5-Methoxy-1,2-dimethyl-1H-indol-3-yl)-<br/>(3-[1,2,4]triazolo[4,3-a]pyridin-3-yl-<br/>piperidin-1-yl)-methanone</p> |  | <p><b>61 ± 7</b></p> | 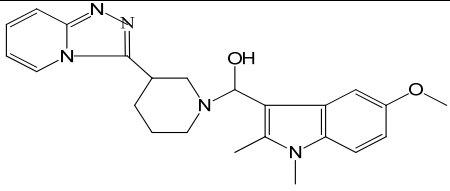 |
|-------------------------------------------------------------------------------------------------------------------------|--|----------------------|-------------------------------------------------------------------------------------|

## Supplementary Figure 1: SR144528 analogs and their binding to CB<sub>2</sub> receptors

This figure provides structural information on how and where the chemistry was modified. Also included are the binding data of four novel compounds, ES51, ES52, ES55 and ES58, all of which are referred to in the text. A) Chemical structure of NIR-mbc94. B) The addition of linker arms and (C) conjugation of the NIR-emitting dye to the R1 and R2 moieties (see Figure 1A) of SR144528 obliterated binding to CB<sub>2</sub> receptors (D,E), as determined by radioligand binding using [<sup>3</sup>H]-CP-55,940 and homogenates prepared from DBT cells that heterologously express mouse CB<sub>2</sub> receptors. Each data point represents the mean ± s.e.m. from three experiments, each performed in triplicate (using homogenates prepared from independent cell cultures).

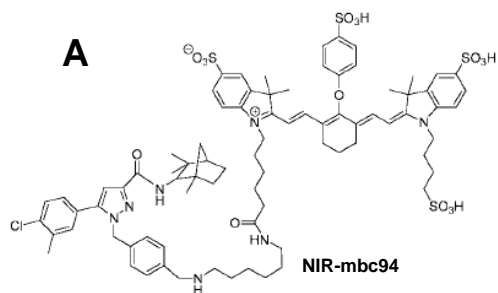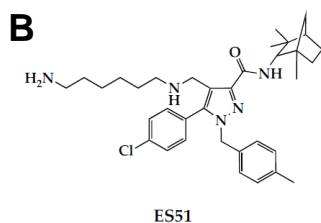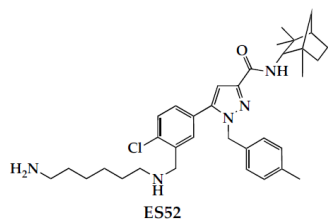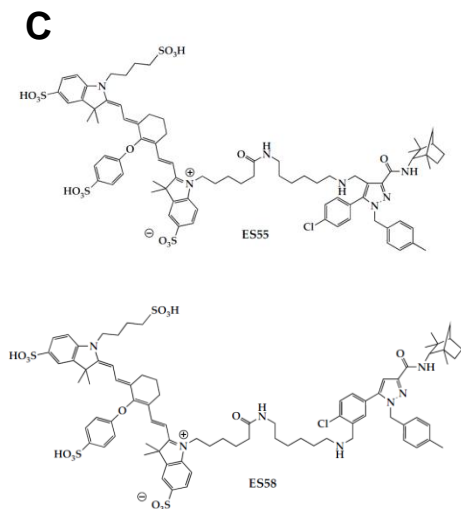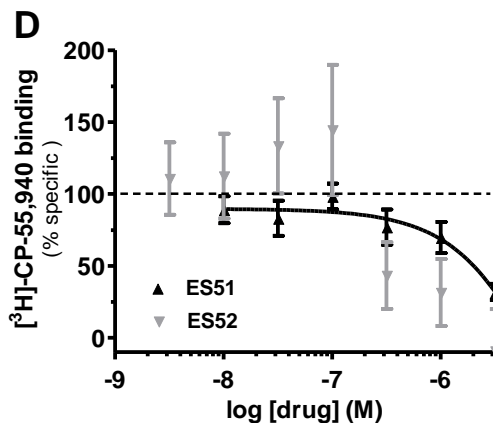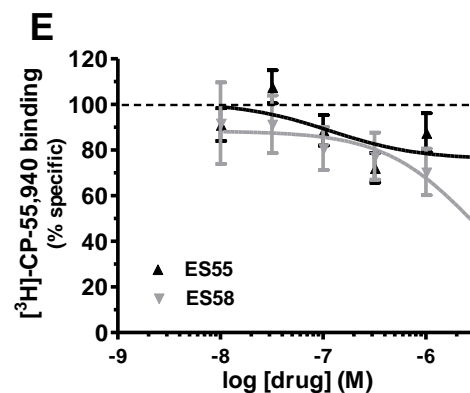

**Supplementary Figure 2: Visualization of CB<sub>2</sub> receptors**

This figure details the microscopy work provided in Figure 2B. Here we separated the images out to provide microscopic details. Intact DBT cells heterologously-expressing mouse CB<sub>2</sub> receptors were incubated with NIR-mbc94 (CB<sub>2</sub>-mid). These cells are co-transfected with GFP and co-stained with DRAQ5 to visualize their cytosol and nuclei, respectively. Here, two points should be emphasized. First, to identify specific staining, all images were gated to the staining of non-transfected DBT cells (set to zero). 2) Co-incubation of NIR-mbc94 with the CB<sub>2</sub> agonist WIN-55,212-2 (WIN; 150 nM) outcompeted the binding of this MI agent to CB<sub>2</sub>-mid cells.

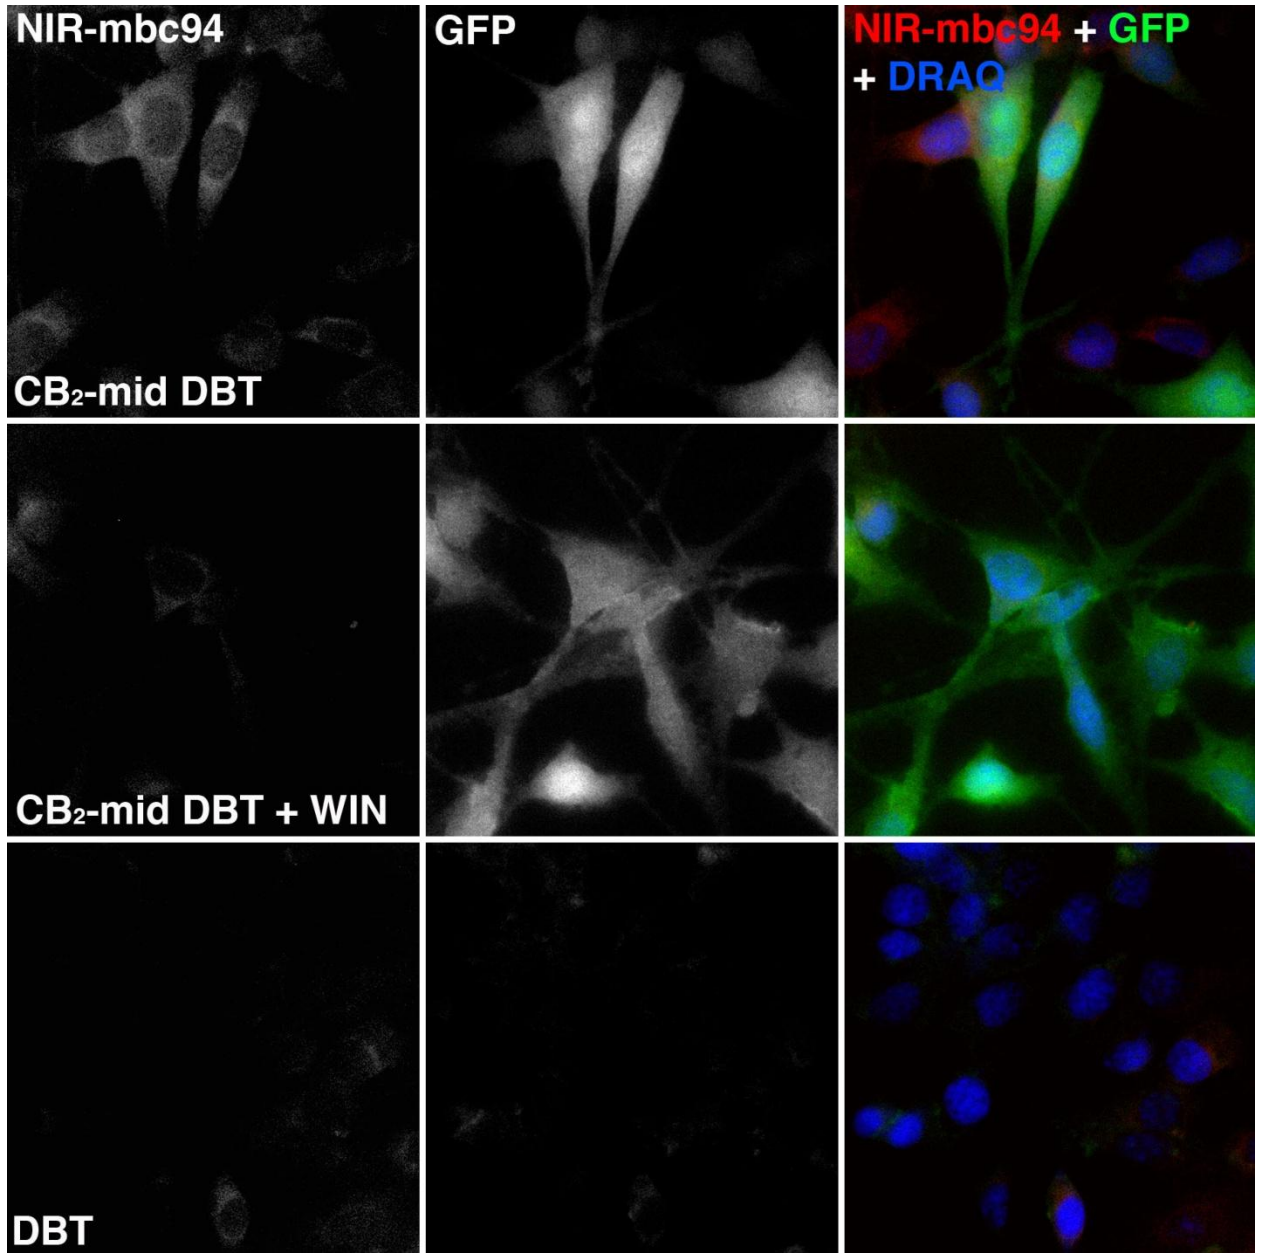

**Supplementary Figure 3: qPCR result showing increase in CB<sub>2</sub> receptor mRNA in primary microglia.**

This figure shows the changes in mRNA for CB<sub>2</sub> receptor expressed by primary microglia stimulated with different cytokines for 72 hours. This result is related to Figure 3B. Note that IL-4 treatment of primary microglia cultures induced a 5-fold change in CB<sub>2</sub> receptor mRNA, while other cytokines did not affect the expression of this message.

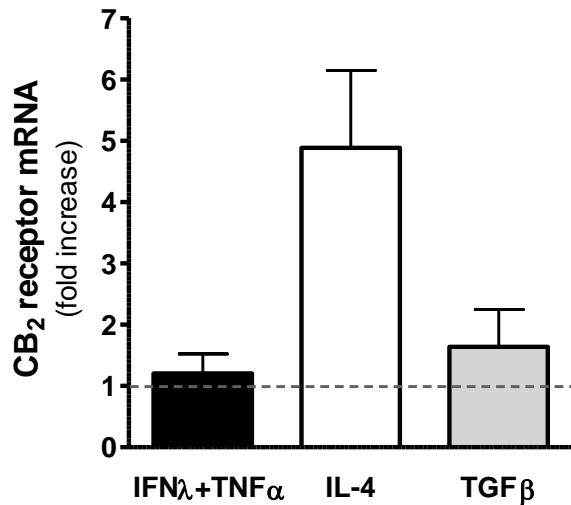

Supplement: NIHMS398530-supplement-Supplemental_Data.pdf [file NIHMS398530-supplement-Supplemental_Data.pdf]
